# Supplementary material
Source: PubMed Central journal article supplement (PMC6547126)
Supplement: jamapediatr-e191439-s001.pdf [file jamapediatr-e191439-s001.pdf]

## Supplementary Online Content

Cohen E, Rodean J, Diong C, et al. Low-value diagnostic imaging use in the pediatric emergency department in the United States and Canada. Published online June 3, 2019. *JAMA Pediatr*. doi:10.1001/jamapediatrics.2019.1439

**eTable 1.** Diagnostic imaging codes from the Ontario Health Insurance Plan (OHIP) and Pediatric Health Information System (PHIS)

**eTable 2.** International Classification of Diseases 9<sup>th</sup> and 10<sup>th</sup> versions (ICD9 and ICD10) used in the study.

**eTable 3.** Rates of imaging and hospital admission within 3 days among discharged children without imaging from the ED in 4 children's hospitals in Ontario, Canada and 26 children's hospitals in the United States limited to 2016.

**eTable 4.** Admission and ICU/Surgery/Death within 7 days of ED visit among discharged children without imaging by diagnosis in 4 children's hospitals in Ontario, Canada and 26 children's hospitals in the United States, 2006 to 2016.

**eTable 5.** Hospital admission rates and ICU/surgery/death 3-days and 7-days following ED discharge among all children (with and without imaging) in 4 children's hospitals in Ontario, Canada and 26 children's hospitals in the United States, 2006 to 2016.

**eTable 6.** Rates of imaging among all children and limited to those without complex chronic conditions (CCC) who were discharged from the ED in 4 children's hospitals in Ontario, Canada and 26 children's hospitals in the United States, 2006 to 2016.

**eTable 7.** Sub-analysis: Hospital admission rates and ICU/surgery/death 3-days and 7-days following ED discharge among children without a complex chronic condition (with and without imaging) and outcomes in 4 children's hospitals in Canada and 26 children's hospitals in the United States, 2006 to 2016.

**eFigure.** Diagnostic imaging use among quality control conditions from the emergency department in 4 children's hospitals in Ontario, Canada and 26 children's hospitals in the United States, 2006 to 2016.

**eReferences.**

This supplementary material has been provided by the authors to give readers additional information about their work.

**eTable 1.** Diagnostic imaging codes from the Ontario Health Insurance Plan (OHIP)<sup>a</sup> and Pediatric Health Information System (PHIS)

| <b>Imaging Modality</b> | <b>Location</b> | <b>OHIP (Ontario, Canada)<sup>a</sup></b>                                                                                                                                                                                                                                                                                                               | <b>PHIS (United States)</b>                                                                                                                                                                                                                                            |
|-------------------------|-----------------|---------------------------------------------------------------------------------------------------------------------------------------------------------------------------------------------------------------------------------------------------------------------------------------------------------------------------------------------------------|------------------------------------------------------------------------------------------------------------------------------------------------------------------------------------------------------------------------------------------------------------------------|
| <b>X-ray</b>            | <b>Chest</b>    | X039, X040, X045, X047, X090, X091, X092, X096, X195, X209, X211, 3GT10VA, 3GY10VA, 3GY18VA, 3SK10VA, 3SL10VA, 3SM10VA, 3SM12VA, 3TB10KM, 3TB10VA, 3YM10VA, 3GY10VV, 3GY10VZ, 3GY10WX, 3GY18VV, 3IM10VC, 3JY10VC                                                                                                                                        | 400011, 400911, 422311, 422411, 424211, 427911, 431011, 433011, 433111, 433211, 433311, 433411, 433511, 433611, 433711, 433811, 433911, 441311, 441611                                                                                                                 |
|                         | <b>Abdomen</b>  | X036, X037, X060, X100, X101, X103, X104, X108, X109, X110, X111, X113, X117, X122, X123, X129, X130, X134, X135, X137, X139, X140, X191, X197, X231, X232, X233, 3OT10VA, 3OT10VH, 3OT12VA, 3PH10VA, 3PM12VA, 3PS10VA, 3OE10WZ, 3OT10VZ, 3OT10WG, 3OT10WX, 3PM10WN, 3PM10WX, 3PM10WQ, 3PM10XJ, 3PM10XN, 3PQ10XJ, 3PS10VC                               | 400011, 400911, 416011, 422011, 422111, 422311, 422411, 422511, 422611, 422911, 424111, 426511, 431011, 431111, 433011, 433111, 433211, 433311, 433411, 433511, 433611, 433711, 433811, 433911, 441011, 441111, 441211, 441311, 441411, 441511, 441611, 441911, 442211 |
| <b>Ultrasound</b>       | <b>Abdomen</b>  | J128, J135, J138, J149, J157, J158, J159, J160, J161, J162, J163, J166, J167, J183, J205, J206, J207, J428, J435, J438, J462, J483, J506, 3KE30DD, 3KQ30DC, 3KQ30DD, 3KT30DA, 3OA30DA, 3OA30DC, 3OT30DA, 3OT30DB, 3OT30DC, 3OT30DD, 3PC30DA, 3PC30DC, 3PC30DD, 3PM30DA, 3QG30DA, 3QG30DC, 3QG30DD, 3QZ30DA, 3RZ30DA, 3RZ30LA, 3VA30DA, 5AB03CK, 5AB03JA | 400041, 400141, 400941, 425141, 441041, 441042, 441141, 441142, 441241, 441242, 441941, 441942, 443441, 444741, 445141, 445142, 445241, 445341, 445441, 451041, 452041, 454041, 455041, 455141, 455241, 455741, 456241, 457041, 457042, 490041, 495041                 |
| <b>CT Scan</b>          | <b>Head</b>     | X188, X400, X401, X402, X405, X408, 3AN20VA, 3AN20WA, 3AN20WC, 3AN20WE, 3CA20VA, 3CA20WA, 3CA20WC, 3CA20WE, 3DR20WA, 3DR20WC, 3DR20WE, 3EA20VA, 3EA20WA, 3EA20WC, 3EA20WE, 3EL20VA, 3EL20WA, 3EL20WC, 3EL20WE, 3ER20VA, 3ER20WA, 3ER20WC, 3ER20WE, 3EY20VA, 3EY20WA, 3EY20WC, 3EY20WE, 3FX20WA, 3FX20WC, 3FX20WE                                        | 400051, 400951, 410051, 410071, 411051, 414051, 415151, 416051, 417051, 421151, 421351, 421751, 441051, 441151, 441251, 471051                                                                                                                                         |

**eTable 1. (continued)**

| <b>Imaging Modality</b> | <b>Location</b> | <b>OHIP (Ontario, Canada)<sup>a</sup></b>                                                                                                                                                   | <b>PHIS (United States)</b>                                                                                                                                    |
|-------------------------|-----------------|---------------------------------------------------------------------------------------------------------------------------------------------------------------------------------------------|----------------------------------------------------------------------------------------------------------------------------------------------------------------|
|                         | <b>Abdomen</b>  | X126, X409, X410, 3KE20WC, 3KT20WC, 3KT20WE, 3OT20VA, 3OT20WA, 3OT20WC, 3OT20WE, 3PC20VA, 3PC20WA, 3PC20WC, 3PC20WE, 3PZ20VA, 3PZ20WA, 3WZ20VA, 3WZ20WA, 3ZZ20VA, 3ZZ20WA, 3ZZ20WC, 3ZZ20WE | 441051, 441151, 441251, 400951, 495051, 497051, 400051, 401071, 475051, 475151, 477051, 495251, 495951, 422351, 422451, 433051, 473051, 454151, 445151, 452051 |
| <b>MRI</b>              | <b>Head</b>     | X421, X425, 3AF40WE, 3AN40VA, 3AN40WA, 3AN40WC, 3AN40WE, 3CA40VA, 3CA40WA, 3CA40WC, 3CA40WE, 3DR40WE, 3ER40VA, 3ER40WA, 3ER40WC, 3ER40WE, 3JX40VA, 3JX40WA, 3JX40WC, 3WZ40VA                | 400052, 400952, 410052, 411052, 411152, 411452, 417052, 422152, 426152, 470052, 471052, 472052                                                                 |

<sup>a</sup> OHIP codes supplemented by intervention codes from the Canadian Institute for Health Information's Canadian Classification of Interventions (<https://www.cihi.ca/en/ci-coding-structure>)

**eTable 2.** International Classification of Diseases 9<sup>th</sup> and 10<sup>th</sup> versions (ICD9 and ICD10) used in the study. Conditions in *italics* were used for quality controls.

| <b>Condition</b>                             | <b>ICD9</b>                                                                                                                                                                               | <b>ICD-10</b>                                                                                                                                | <b>References*</b> |
|----------------------------------------------|-------------------------------------------------------------------------------------------------------------------------------------------------------------------------------------------|----------------------------------------------------------------------------------------------------------------------------------------------|--------------------|
| <b>Bronchiolitis</b>                         | 4661, 46611, 46619                                                                                                                                                                        | J210, J211, J218, J219                                                                                                                       | 1-4                |
| <b>Asthma</b>                                | 493                                                                                                                                                                                       | J45                                                                                                                                          | 5,6                |
| <b><i>Pneumonia</i></b>                      | 481, 482, 4820, 4821, ,4822, 4823<br>48230, 48231, 48232, 48239, 4824,<br>48240, 48241, 48242, 48249, 4828,<br>48281 48282, 48283, 48284, 48289,<br>4829, 483, 4830, 4831, 4838, 485, 486 | J13, J181, J150, J151, J14, J153, J154, J1520,<br>J15211, J15212, J1529, J158, J155, J156, A481,<br>J158, J159, J157, J160, J168, J180, J189 | 5                  |
| <b>Constipation</b>                          | 5640                                                                                                                                                                                      | K590                                                                                                                                         | 7                  |
| <b>Abdominal Pain</b>                        | 7890x                                                                                                                                                                                     | R100, R101, R103, R104, R193                                                                                                                 | 7                  |
| <b><i>Bowel Obstruction</i></b>              | 5601, 5602, 56031, 56032, 56039,<br>56081, 56089, 5601, 5609                                                                                                                              | K560, K562, K563, K564, K565, K566, K567                                                                                                     |                    |
| <b><i>Intussusception</i></b>                | 5600                                                                                                                                                                                      | K561                                                                                                                                         | 7                  |
| <b><i>Pancreatic or Liver Laceration</i></b> | 864,8638                                                                                                                                                                                  | S361, S362                                                                                                                                   |                    |
| <b>Concussion</b>                            | 8500                                                                                                                                                                                      | S060X0                                                                                                                                       | 6,8                |
| <b>Febrile Convulsion</b>                    | 78031 (Simple), 78032 (Complex),                                                                                                                                                          | R600 (Simple, US), R5601 (Complex), R5602<br>(Simple, CA), R5609 (Simple, CA)                                                                | 6,9                |
| <b>Seizure</b>                               | 3450, 34500, 34501, 3451, 34510,<br>34511, 3454, 34540, 34541, 3455,<br>34550, 34551, 78039                                                                                               | G400, G4000, G4001, G401, G4010, G4011, G402,<br>G4020, G4021, G406, G4060, G4061, G407,<br>G4070, G4071, R5860                              |                    |
| <b>Headache</b>                              | 346, 339, 7840                                                                                                                                                                            | G43, G44, R51                                                                                                                                |                    |
| <b><i>Acute Stroke</i></b>                   | 36231, 430, 431, 43301, 43311, 43321,<br>43331, 43381, 43391, 43401, 43411,<br>43491                                                                                                      | H341, I600, I601, I602, I603, I604, I605, I606, I607,<br>I609, I61, I630, I631, I632, I633, I634, I635, I638,<br>I639, I64                   |                    |

\* we utilized previous studies using administrative data to identify ICD codes for specific conditions when available; otherwise, we queried ICD9 and 10 codebooks to identify condition-specific codes to represent the diagnosis of interest.

**eTable 3.** Rates of imaging and hospital admission within 3 days among discharged children without imaging from the ED in 4 children’s hospitals in Ontario, Canada and 26 children’s hospitals in the United States **limited to 2016**.

|                             | Imaging Rates          |                          |                            | Hospital Admission within 3 days of ED visit |                        |                         |
|-----------------------------|------------------------|--------------------------|----------------------------|----------------------------------------------|------------------------|-------------------------|
|                             | Ontario<br>n (%)       | US<br>n (%)              | Difference (95%<br>CI)     | Ontario<br>n (%)                             | US<br>n (%)            | Difference (95%<br>CI)  |
| <b>Chest X Ray</b>          |                        |                          |                            |                                              |                        |                         |
| Bronchiolitis               | 433/2,266<br>(19.1%)   | 7,428/36,925<br>(20.1%)  | -1.0%<br>(-2.7%, 0.7%)     | 59/1,833 (3.2%)                              | 1,078/29,497<br>(3.7%) | -0.4%<br>(-1.3%, 0.4%)  |
| Asthma                      | 608/3,077<br>(19.8%)   | 9,703/57,928<br>(16.6%)  | 3.0%<br>(1.6%, 4.4%)       | 9/2,469 (0.4%)                               | 607/48,225<br>(1.3%)   | -0.9%<br>(-1.2%, -0.6%) |
| <b>Abdominal X Ray</b>      |                        |                          |                            |                                              |                        |                         |
| Constipation                | 794/3,064<br>(25.9%)   | 25,076/39,722<br>(63.1%) | -37.2%<br>(-38.8%, -35.6%) | ≤5/2,270 (0.1%)                              | 104/14,646<br>(0.7%)   | *                       |
| Abdominal Pain              | 873/6,610<br>(13.2%)   | 19,279/52,695<br>(22.5%) | -23.4%<br>(-24.3%, -22.5%) | 63/5,737 (1.1%)                              | 500/33,416<br>(1.5%)   | -0.4%<br>(-0.7%, -0.1%) |
| <b>Abdominal Ultrasound</b> |                        |                          |                            |                                              |                        |                         |
| Constipation                | 187/3,064 (6.1%)       | 4,103/39,722<br>(10.3%)  | -4.2%<br>(-5.1%, -3.3%)    | 8/2,877 (0.3%)                               | 360/35,619<br>(1.0%)   | -0.7%<br>(-1.0%, -0.5%) |
| Abdominal Pain              | 2,120/6,610<br>(32.1%) | 17,828/52,695<br>(33.8%) | -1.8%<br>(-3.0%, -0.6%)    | 23/4,490 (0.5%)                              | 461/34,867<br>(1.3%)   | -0.8%<br>(-1.1%, -0.6%) |
| <b>Abdominal CT</b>         |                        |                          |                            |                                              |                        |                         |
| Constipation                | ≤5/3,064 (0.1%)        | 395/39,722<br>(1.0%)     | *                          | 10/3,061 (0.3%)                              | 411/39,327<br>(1.0%)   | -0.7%<br>(-0.9%, -0.5%) |
| Abdominal Pain              | 34/6,610 (0.5%)        | 2,397/52,695<br>(4.6%)   | -4.0%<br>(-4.3%, -3.8%)    | 89/6,576 (1.4%)                              | 712/50,298<br>(1.4%)   | -0.1%<br>(-0.4%, 0.2%)  |

**eTable 3. (continued)**

|                            | Imaging Rates    |                         |                         | Hospital Admission within 3 days of ED visit |                      |                        |
|----------------------------|------------------|-------------------------|-------------------------|----------------------------------------------|----------------------|------------------------|
|                            | Ontario<br>n (%) | US<br>n (%)             | Difference<br>(95%)     | Ontario<br>n (%)                             | US<br>n (%)          | Difference<br>(95% CI) |
| <b>Head CT</b>             |                  |                         |                         |                                              |                      |                        |
| Simple Febrile Convulsion  | 4/841 (0.5%)     | 100/7,725 (1.3%)        | *                       | 17/837 (2.0%)                                | 202/7,625 (2.6%)     | -0.6%<br>(-1.6%, 0.4%) |
| Complex Febrile Convulsion | ≤5//33 (6.1%)    | 44/502 (8.8%)           | *                       | ≤5//31 (3.2%)                                | 17/458 (3.7%)        | *                      |
| Seizure                    | 13/209 (6.2%)    | 30/445 (6.7%)           | -0.5%<br>(-4.5%, 3.5%)  | 6/196 (3.1%)                                 | 17/415 (4.1%)        | -1.0%<br>(-4.1%, 2.0%) |
| Headache                   | 202/2,384 (8.5%) | 4,170/32,429<br>(12.9%) | -4.4%<br>(-5.6%, -3.2%) | 34/2,182 (1.6%)                              | 465/28,259<br>(1.7%) | -0.1%<br>(-0.6%, 0.5%) |
| <b>Head MRI</b>            |                  |                         |                         |                                              |                      |                        |
| Concussion                 | 11/2,811 (0.4%)  | 36/11,611 (0.3%)        | 0.1%<br>(-0.2%, 0.3%)   | ≤5//2,800 (0.2%)                             | 31/11,575 (0.3%)     | *                      |
| Seizure                    | 7/209 (3.3%)     | 15/445 (3.4%)           | 0.0%<br>(-3.0%, 2.9%)   | ≤5//202 (2.0%)                               | 16/430 (3.7%)        | *                      |
| Headache                   | 116/2,384 (4.9%) | 930/32,429<br>(2.9%)    | 2.0%<br>(1.1%, 2.9%)    | 31/2,268 (1.4%)                              | 516/31,499<br>(1.6%) | -0.3%<br>(-0.8%, 0.2%) |

CCC: complex chronic conditions  
 CT: computed tomography  
 MRI: magnetic resonance imaging

**eTable 4.** Admission and ICU/Surgery/Death within **7 days** of ED visit among discharged children **without imaging** by diagnosis in 4 children’s hospitals in Ontario, Canada and 26 children’s hospitals in the United States, 2006 to 2016.

|                             | Hospital Admission within 7-days of ED visit |                        |                         | Hospital Admission within 7-days of ED visit resulting in ICU care, surgery, or death |                        |                         |
|-----------------------------|----------------------------------------------|------------------------|-------------------------|---------------------------------------------------------------------------------------|------------------------|-------------------------|
|                             | Ontario<br>n (%)                             | US<br>n (%)            | Difference<br>(95%CI)   | Ontario<br>n (%)                                                                      | US<br>n (%)            | Difference<br>(95%CI)   |
| <b>Chest X Ray</b>          |                                              |                        |                         |                                                                                       |                        |                         |
| Bronchiolitis               | 626/14,256<br>(4.4%)                         | 9235/215,108<br>(4.3%) | 0.1%<br>(-0.2%, 0.4%)   | 25/14,256<br>(0.2%)                                                                   | 1119/215,108<br>(0.5%) | -0.3%<br>(-0.4%, -0.3%) |
| Asthma                      | 205/29,278<br>(0.7%)                         | 8380/502,310<br>(1.7%) | -1.0%<br>(-1.1%, -0.9%) | 20/29,278<br>(0.1%)                                                                   | 752/502,310<br>(0.1%)  | -0.1%<br>(-0.1%, 0.0%)  |
| <b>Abdominal X Ray</b>      |                                              |                        |                         |                                                                                       |                        |                         |
| Constipation                | 158/19,930<br>(0.8%)                         | 1233/113,166<br>(1.1%) | -0.3%<br>(-0.4%, -0.2%) | 26/19,930<br>(0.1%)                                                                   | 208/113,166<br>(0.2%)  | -0.1%<br>(-0.1%, 0.0%)  |
| Abdominal Pain              | 677/41,167<br>(1.6%)                         | 6009/289,917<br>(2.1%) | -0.4%<br>(-0.6%, -0.3%) | 214/41,167<br>(0.5%)                                                                  | 1678/289,917<br>(0.6%) | -0.1%<br>(-0.1%, 0.0%)  |
| <b>Abdominal Ultrasound</b> |                                              |                        |                         |                                                                                       |                        |                         |
| Constipation                | 351/31,443<br>(1.1%)                         | 4409/292,974<br>(1.5%) | -0.4%<br>(-0.5%, -0.3%) | 69/31,443<br>(0.2%)                                                                   | 815/292,974<br>(0.3%)  | -0.1%<br>(-0.1%, 0.0%)  |
| Abdominal Pain              | 557/38,022<br>(1.5%)                         | 7866/374,904<br>(2.1%) | -0.6%<br>(-0.8%, -0.5%) | 174/38,022<br>(0.5%)                                                                  | 2088/374,904<br>(0.6%) | -0.1%<br>(-0.1%, 0.0%)  |
| <b>Abdominal CT</b>         |                                              |                        |                         |                                                                                       |                        |                         |
| Constipation                | 434/33,345<br>(1.3%)                         | 4753/310,685<br>(1.5%) | -0.2%<br>(-0.4%, -0.1%) | 92/33,345<br>(0.3%)                                                                   | 877/310,685<br>(0.3%)  | 0.0%<br>(-0.1%, 0.0%)   |
| Abdominal Pain              | 997/50,888<br>(2.0%)                         | 9629/452,381<br>(2.1%) | -0.2%<br>(-0.3%, 0.0%)  | 300/50,888<br>(0.6%)                                                                  | 2529/452,381<br>(0.6%) | 0.0%<br>(0.0%, 0.1%)    |
| <b>Head CT</b>              |                                              |                        |                         |                                                                                       |                        |                         |
| Concussion                  | 21/15,563<br>(0.1%)                          | 130/47,760<br>(0.3%)   | -0.1%<br>(-0.2%, -0.1%) | ≤5/15,563                                                                             | 24/47,760<br>(0.1%)    | *                       |
| Simple Febrile Convulsion   | 83/5265<br>(1.6%)                            | 2071/81,916<br>(2.5%)  | -1.0%<br>(-1.3%, -0.6%) | ≤5/5265                                                                               | 134/81,916<br>(0.2%)   | *                       |
| Complex Febrile Convulsion  | ≤5/165                                       | 109/2513 (4.3%)        | *                       | ≤5/165                                                                                | 7/2513<br>(0.3%)       | *                       |
| Seizure                     | 74/2109<br>(3.5%)                            | 3624/70,488<br>(5.1%)  | -1.6%<br>(-2.4%, -0.8%) | ≤5/2109                                                                               | 413/70,488<br>(0.6%)   | *                       |
| Headache                    | 286/17,891<br>(1.6%)                         | 5542/205,501<br>(2.7%) | -1.1%<br>(-1.3%, -0.9%) | 47/17,891<br>(0.3%)                                                                   | 577/205,501<br>(0.3%)  | 0.0%<br>(-0.1%, 0.1%)   |
| <b>Head MRI</b>             |                                              |                        |                         |                                                                                       |                        |                         |

**eTable 4. (continued)**

|            | Hospital Admission within 7-days of ED visit |                        |                         | Hospital Admission within 7-days of ED visit resulting in ICU care, surgery, or death |                       |                         |
|------------|----------------------------------------------|------------------------|-------------------------|---------------------------------------------------------------------------------------|-----------------------|-------------------------|
|            | Ontario<br>n (%)                             | US<br>n (%)            | Difference<br>(95%CI)   | Ontario<br>n (%)                                                                      | US<br>n (%)           | Difference<br>(95%CI)   |
| Concussion | 37/17,315<br>(0.2%)                          | 286/71,333<br>(0.4%)   | -0.2%<br>(-0.3%, 0.0%)  | ≤5/17,315                                                                             | 41/71,333<br>(0.1%)   | *                       |
| Seizure    | 80/2254<br>(3.5%)                            | 4204/84,343<br>(5.0%)  | -0.1%<br>(-0.2%, -0.1%) | 6/2254<br>(0.3%)                                                                      | 474/84,343<br>(0.6%)  | -0.3%<br>(-0.3%, -0.5%) |
| Headache   | 350/19,929<br>(1.8%)                         | 7100/250,813<br>(2.8%) | -1.0%<br>(-1.3%, -0.6%) | 58/19,929<br>(0.3%)                                                                   | 964/250,813<br>(0.4%) | -0.1%<br>(-0.2%, 0.0%)  |

US: United States

CT: computed tomography

MRI: magnetic resonance imaging

ICU: intensive care unit

\* unable to calculate due to suppressed data as a result of small cell sizes



**eTable 5.** Hospital admission rates and ICU/surgery/death 3-days and 7-days following ED discharge **among all children (with and without imaging)** in 4 children’s hospitals in Ontario, Canada and 26 children’s hospitals in the United States, 2006 to 2016. All data are presented as n (%) unless stated otherwise.

| Imaging modality by Condition | Hospital Admission within 3 days of ED visit |                       |                      | Hospital Admission within 7 days of ED visit |                       |                      |
|-------------------------------|----------------------------------------------|-----------------------|----------------------|----------------------------------------------|-----------------------|----------------------|
|                               | Ontario n (%)                                | US n (%)              | Difference (95%CI)   | Ontario n (%)                                | US n (%)              | Difference (95%CI)   |
| <b>Chest X Ray</b>            |                                              |                       |                      |                                              |                       |                      |
| Bronchiolitis                 | 820/18,781 (4.4%)                            | 11,763/311,303 (3.8%) | 0.6% (0.3%, 0.9%)    | 939/18,781 (5.0%)                            | 13,943/311,303 (4.5%) | 0.5% (0.2%, 0.8%)    |
| ICU/surgery/death             | 56/18,781 (0.3%)                             | 1384/311,303 (0.4%)   | -0.1% (-0.2%, -0.1%) | 59/18,781 (0.3%)                             | 1636/311,303 (0.5%)   | -0.2% (-0.3%, -0.1%) |
| Asthma                        | 306/37,560 (0.8%)                            | 10,085/650,379 (1.6%) | -0.7% (-0.8%, -0.6%) | 393/37,560 (1.0%)                            | 12,276/650,379 (1.9%) | -0.8% (-0.9%, -0.7%) |
| ICU/surgery/death             | 22/37,560 (0.1%)                             | 852/650,379 (0.1%)    | -0.1% (-0.1%, 0.0%)  | 36/37,560 (0.1%)                             | 1139/650,379 (0.2%)   | -0.1% (-0.1%, 0.0%)  |
| <b>Abdominal X Ray</b>        |                                              |                       |                      |                                              |                       |                      |
| Constipation                  | 299/33,386 (0.9%)                            | 3268/314,486 (1.0%)   | -0.1% (-0.3%, 0.0%)  | 442/33,386 (1.3%)                            | 4882/314,486 (1.6%)   | -0.2% (-0.4%, -0.1%) |
| ICU/surgery/death             | 72/33,386 (0.2%)                             | 655/314,486 (0.2%)    | 0.0% (0.0%, 0.1%)    | 97/33,386 (0.3%)                             | 908/314,486 (0.3%)    | 0.0% (-0.1%, 0.1%)   |
| Abdominal Pain                | 753/51,320 (1.5%)                            | 8031/486,480 (1.7%)   | -0.2% (-0.3%, -0.1%) | 1,036/51,320 (2.0%)                          | 10,919/486,480 (2.2%) | -0.2% (-0.4%, -0.1%) |
| ICU/surgery/death             | 251/51,320 (0.5%)                            | 2199/486,480 (0.5%)   | 0.0% (0.0%, 0.1%)    | 311/51,320 (0.6%)                            | 2885/486,480 (0.6%)   | 0.0% (-0.1%, 0.1%)   |
| <b>Abdominal Ultrasound</b>   |                                              |                       |                      |                                              |                       |                      |
| Constipation                  | 299/33,386 (0.9%)                            | 3268/314,486 (1.0%)   | -0.1% (-0.3%, 0.0%)  | 442/33,386 (1.3%)                            | 4882/314,486 (1.6%)   | -0.2% (-0.4%, -0.1%) |
| ICU/surgery/death             | 72/33,386 (0.2%)                             | 655/314,486 (0.2%)    | 0.0% (0.0%, 0.1%)    | 97/33,386 (0.3%)                             | 908/314,486 (0.3%)    | 0.0% (-0.1%, 0.1%)   |
| Abdominal Pain                | 753/51,320 (1.5%)                            | 8031/486,480 (1.7%)   | 0.2% (-0.3%, -0.1%)  | 1,036/51,320 (2.0%)                          | 10,919/486,480 (2.2%) | -0.2% (-0.4%, -0.1%) |
| ICU/surgery/death             | 251/51,320 (0.5%)                            | 2199/486,480 (0.5%)   | 0.0% (0.0%, 0.1%)    | 311/51,320 (0.6%)                            | 2885/486,480 (0.6%)   | 0.0% (-0.1%, 0.1%)   |

**eTable 5. (continued)**

| Imaging modality by Condition | Hospital Admission within 3 days of ED visit |                     |                      | Hospital Admission within 7 days of ED visit |                       |                      |
|-------------------------------|----------------------------------------------|---------------------|----------------------|----------------------------------------------|-----------------------|----------------------|
|                               | Ontario n (%)                                | US n (%)            | Difference (95%CI)   | Ontario n (%)                                | US n (%)              | Difference (95%CI)   |
| <b>Abdominal CT</b>           |                                              |                     |                      |                                              |                       |                      |
| Constipation                  | 299/33,386 (0.9%)                            | 3268/314,486 (1.0%) | -0.1% (-0.3%, 0.0%)  | 442/33,386 (1.3%)                            | 4882/314,486 (1.6%)   | -0.2% (-0.4%, -0.1%) |
| ICU/surgery/death             | 72/33,386 (0.2%)                             | 655/314,486 (0.2%)  | 0.0% (0.0%, 0.1%)    | 97/33,386 (0.3%)                             | 908/314,486 (0.3%)    | 0.0% (-0.1%, 0.1%)   |
| Abdominal Pain                | 753/51,320 (1.5%)                            | 8031/486,480 (1.7%) | -0.2% (-0.3%, -0.1%) | 1,036/51,320 (2.0%)                          | 10,919/486,480 (2.2%) | -0.2% (-0.4%, -0.1%) |
| ICU/surgery/death             | 251/51,320 (0.5%)                            | 2199/486,480 (0.5%) | 0.0% (0.0%, 0.1%)    | 311/51,320 (0.6%)                            | 2885/486,480 (0.6%)   | 0.0% (-0.1%, 0.1%)   |
| <b>Head CT</b>                |                                              |                     |                      |                                              |                       |                      |
| Concussion                    | 31/17,363 (0.1%)                             | 199/71,533 (0.3%)   | -0.1% (-0.2%, 0.0%)  | 40/17,363 (0.2%)                             | 288/71,533 (0.4%)     | -0.2% (-0.3%, -0.1%) |
| ICU/surgery/death             | ≤5/17,363                                    | 21/71,533 (0.0%)    | *                    | 7/17,363 (0.0%)                              | 41/71,533 (0.1%)      | 0.0% (-0.1%, 0.0%)   |
| Simplex Febrile Convulsion    | 81/5309 (1.5%)                               | 1888/84,011 (2.2%)  | -0.7% (-1.1%, -0.4%) | 90/5309 (1.6%)                               | 2176/84,011 (2.6%)    | -0.9% (-1.3%, -0.5%) |
| ICU/surgery/death             | 6/5309 (0.1%)                                | 98/84,011 (0.1%)    | 0.0% (-0.1%, 0.1%)   | 7/5309 (0.1%)                                | 141/84,011 (0.2%)     | 0.0% (-0.1%, 0.1%)   |
| Complex Febrile Convulsion    | 8/173 (4.6%)                                 | 115/2830 (4.1%)     | 0.6% (-2.7%, 3.8%)   | 8/173 (4.6%)                                 | 121/2830 (4.3%)       | 0.3% (-2.9%, 3.6%)   |
| ICU/surgery/death             | ≤5/173                                       | 6/2830 (0.2%)       | *                    | ≤5/173                                       | 8/2830 (0.3%)         | *                    |
| Seizure                       | 61/2291 (2.7%)                               | 3043/85,086 (3.6%)  | -0.9% (-1.6%, -0.2%) | 86/2291 (3.8%)                               | 4237/85,086 (5.0%)    | -1.2% (-2.0%, -0.4%) |
| ICU/surgery/death             | ≤5/2291                                      | 326/85,086 (0.4%)   | *                    | 6/2291 (0.3%)                                | 480/85,086 (0.6%)     | -0.3% (-0.5%, -0.1%) |
| Headache                      | 238/20,520 (1.2%)                            | 4913/256,012 (1.9%) | -0.8% (-0.9%, -0.6%) | 392/20,520 (1.9%)                            | 7325/256,012 (2.9%)   | -1.0% (-1.1%, -0.8%) |
| ICU/surgery/death             | 33/20,520 (0.2%)                             | 637/256,012 (0.2%)  | -0.1% (-0.1%, 0.0%)  | 66/20,520 (0.3%)                             | 1037/256,012 (0.4%)   | -0.1% (-0.2%, 0.0%)  |

**eTable 5. (continued)**

| Imaging modality by Condition | Hospital Admission within 3 days of ED visit |                        |                          | Hospital Admission within 7 days of ED visit |                        |                         |
|-------------------------------|----------------------------------------------|------------------------|--------------------------|----------------------------------------------|------------------------|-------------------------|
|                               | Ontario n (%)                                | US n (%)               | Difference (95%CI)       | Ontario n (%)                                | US n (%)               | Difference (95%CI)      |
| <b>Head MRI</b>               |                                              |                        |                          |                                              |                        |                         |
| Concussion                    | 31/17,363<br>(0.2%)                          | 199/71,533<br>(0.3%)   | -0.1%<br>(-0.2%, 0.0%)   | 40/17,363<br>(0.2%)                          | 288/71,533<br>(0.4%)   | -0.2%<br>(-0.3%, -0.1%) |
| ICU/surgery/death             | ≤5/17,363                                    | 21/71,533<br>(0.0%)    | *                        | 7/17,363<br>(0.0%)                           | 41/71,533<br>(0.1%)    | 0.0%<br>(-0.1%, 0.0%)   |
| Seizure                       | 61/2291<br>(2.7%)                            | 3043/85,086<br>(3.6%)  | -0.9%<br>(-1.6%, -0.25%) | 86/2291<br>(3.8%)                            | 4237/85,086<br>(5.0%)  | -1.2%<br>(-2.0%, -0.4%) |
| ICU/surgery/death             | ≤5/2291                                      | 326/85,086<br>(0.4%)   | *                        | 6/2291<br>(0.3%)                             | 480/85,086<br>(0.6%)   | -0.3%<br>(-0.5%, -0.1%) |
| Headache                      | 238/20,520<br>(1.2%)                         | 4913/256,012<br>(1.9%) | -0.8%<br>(-0.9%, -0.6%)  | 392/20,520<br>(1.9%)                         | 7325/256,012<br>(2.9%) | -1.0%<br>(-1.1%, -0.8%) |
| ICU/surgery/death             | 33/20,520<br>(0.2%)                          | 637/256,012<br>(0.2%)  | -0.1%<br>(-0.1%, 0.0%)   | 66/20,520<br>(0.3%)                          | 1037/256,012<br>(0.4%) | -0.1%<br>(-0.2%, 0.0%)  |

US: United States

CT: computed tomography

MRI: magnetic resonance imaging

ICU: intensive care unit

\* unable to calculate due to suppressed data as a result of small cell sizes

**eTable 6.** Rates of imaging among all children and limited to those without complex chronic conditions (CCC) who were discharged from the ED in 4 children’s hospitals in Ontario, Canada and 26 children’s hospitals in the United States, 2006 to 2016.

|                               | Imaging Rates            |                            |                            |                          |                            |                            |
|-------------------------------|--------------------------|----------------------------|----------------------------|--------------------------|----------------------------|----------------------------|
|                               | All Children             |                            |                            | Children without a CCC   |                            |                            |
|                               | Ontario<br>n (%)         | US<br>n (%)                | Difference (95%<br>CI)     | Ontario<br>n (%)         | US<br>n (%)                | Difference (95%<br>CI)     |
| <b>Chest X Ray</b>            |                          |                            |                            |                          |                            |                            |
| Bronchiolitis                 | 4525/18,781<br>(24.1%)   | 96,195/311,303<br>(30.9%)  | -6.8%<br>(-7.4%, -6.2%)    | 4140/17,435<br>(23.7%)   | 89,825/295,977<br>(30.3%)  | -6.6%<br>(-7.3%, -6.0%)    |
| Asthma                        | 8282/37,560<br>(22.1%)   | 148,069/650,379<br>(22.8%) | -0.7%<br>(-1.1%, -0.3%)    | 7984/36,784<br>(21.7%)   | 138,314/624,466<br>(22.1%) | -0.4%<br>(-0.9%, 0.0%)     |
| <b>Abdominal X Ray</b>        |                          |                            |                            |                          |                            |                            |
| Constipation                  | 13,456/33,386<br>(40.3%) | 201,320/314,486<br>(64.0%) | -23.7%<br>(-24.3%, -23.2%) | 12,806/32,094<br>(39.9%) | 187,073/295,106<br>(63.4%) | -23.5%<br>(-24.1%, -22.9%) |
| Abdominal Pain                | 10,153/51,320<br>(19.8%) | 196,563/486,480<br>(40.4%) | -20.6%<br>(-21.0%, -20.3%) | 9617/49,685<br>(19.4%)   | 182,420/458,400<br>(39.8%) | -20.4%<br>(-20.8%, -20.1%) |
| <b>Abdominal Ultrasound</b>   |                          |                            |                            |                          |                            |                            |
| Constipation                  | 1943/33,386<br>(9.6%)    | 21,512/314,486<br>(6.8%)   | -1.0%<br>(-1.3%, -0.8%)    | 1809/32,094<br>(5.6%)    | 21,512/314,486<br>(6.8%)   | -1.2%<br>(-1.5%, -0.9%)    |
| Abdominal Pain                | 13,298/51,320<br>(25.9%) | 111,576/486,480<br>(22.9%) | 3.0%<br>(2.6%, 3.4%)       | 12,777/49,685<br>(25.7%) | 105,520/458,400<br>(23.0%) | 2.7%<br>(2.3%, 3.1%)       |
| <b>Abdominal CT</b>           |                          |                            |                            |                          |                            |                            |
| Constipation                  | 41/33,386<br>(0.1%)      | 3801/314,486<br>(1.2%)     | -1.1%<br>(-1.1%, -1.0%)    | 38/32,094<br>(0.1%)      | 3473/295,106<br>(1.2%)     | -1.1%<br>(-1.1%, -1.0%)    |
| Abdominal Pain                | 432/51,320<br>(0.8%)     | 34,099/486,480<br>(7.0%)   | -6.2%<br>(-6.3%, -6.1%)    | 397/49,685<br>(0.8%)     | 32,021/458,400<br>(7.0%)   | -6.2%<br>(-6.3%, -6.1%)    |
| <b>Head CT</b>                |                          |                            |                            |                          |                            |                            |
| Concussion                    | 1800/17,363<br>(10.4%)   | 23,773/71,533<br>(33.2%)   | -22.9%<br>(-23.4%, -22.3%) | 1780/17,261<br>(10.3%)   | 23,088/69,838<br>(33.1%)   | -22.7%<br>(-23.3%, -22.2%) |
| Simple Febrile<br>Convulsion  | 44/5309<br>(0.8%)        | 2095/84,011<br>(2.5%)      | -1.7%<br>(-1.9%, -1.4%)    | 43/5222<br>(0.8%)        | 1878/80,708<br>(2.3%)      | -1.5%<br>(-1.8%, -1.2%)    |
| Complex Febrile<br>Convulsion | 8/173<br>(4.6%)          | 317/2830<br>(11.2%)        | -6.6%<br>(-9.9%, -3.2%)    | 7/171<br>(4.1%)          | 303/2635<br>(11.5%)        | -7.4%<br>(-10.6%, -4.2%)   |

**eTable 6. (continued)**

|                 | Imaging Rates           |                           |                          |                        |                           |                          |
|-----------------|-------------------------|---------------------------|--------------------------|------------------------|---------------------------|--------------------------|
|                 | All Children            |                           |                          | Children without a CCC |                           |                          |
|                 | Ontario<br>n (%)        | US<br>n (%)               | Difference (95%<br>CI)   | Ontario<br>n (%)       | US<br>n (%)               | Difference (95%<br>CI)   |
| Seizure         | 182/2291<br>(7.9%)      | 14,598/85,086<br>(17.2%)  | -9.2%<br>(-10.3%, -8.1%) | 169/2041<br>(8.3%)     | 11,216/64,870<br>(17.3%)  | -9.0%<br>(-10.2%, -7.8%) |
| Headache        | 2,629/20,520<br>(12.8%) | 50,511/256,012<br>(19.7%) | -6.9%<br>(-7.4%, -6.4%)  | 2299/19,478<br>(11.8%) | 39,732/230,516<br>(17.2%) | -5.4%<br>(-5.9%, -5.0%)  |
| <b>Head MRI</b> |                         |                           |                          |                        |                           |                          |
| Concussion      | 48/17,363<br>(0.3%)     | 200/71,533<br>(0.3%)      | 0.0%<br>(-0.1%, 0.1%)    | 48/17,261<br>(0.3%)    | 176/69,838<br>(0.3%)      | 0.0%<br>(-0.1%,0.1%)     |
| Seizure         | 37/2291<br>(1.6%)       | 743/85,086<br>(0.9%)      | 0.7%<br>(0.2%, 1.3%)     | 32/2041<br>(1.6%)      | 512/64,870<br>(0.8%)      | 0.8%<br>(0.3%, 1.3%)     |
| Headache        | 591/20,520<br>(2.9%)    | 5199/256,012<br>(2.0%)    | 0.8%<br>(0.6%, 1.1%)     | 512/19,478<br>(2.6%)   | 5199/230,516<br>(2.3%)    | 0.4%<br>(0.1%, 0.6%)     |

CCC: complex chronic condition  
 CT: computed tomography  
 MRI: magnetic resonance imaging

**eTable 7.** Hospital admission rates and ICU/surgery/death 3-days and 7-days following ED discharge **for discharged children without a complex chronic condition** (with and without imaging) and outcomes in 4 children’s hospitals in Canada and 26 children’s hospitals in the United States, 2006 to 2016. All data are presented as n (%) unless stated otherwise.

| Imaging modality by Condition | Hospital Admission within 3 days of ED visit |                          |                         | Hospital Admission within 7 days of ED visit |                          |                         |
|-------------------------------|----------------------------------------------|--------------------------|-------------------------|----------------------------------------------|--------------------------|-------------------------|
|                               | Ontario n (%)                                | US n (%)                 | Difference (95%CI)      | Ontario n (%)                                | US n (%)                 | Difference (95%CI)      |
| <b>Chest X Ray</b>            |                                              |                          |                         |                                              |                          |                         |
| Bronchiolitis                 | 731/17,435<br>(4.2%)                         | 10,664/295,977<br>(3.6%) | 0.6%<br>(0.3%, 0.9%)    | 828/17,435<br>(4.7%)                         | 12,528/295,977<br>(4.2%) | 0.4%<br>(0.1%, 0.7%)    |
| ICU/surgery/death             | 45/17,435<br>(0.3%)                          | 1181/295,977<br>(0.4%)   | -0.1%<br>(-0.2%, -0.1%) | 45/17,435<br>(0.3%)                          | 1361/295,977<br>(0.5%)   | -0.2%<br>(-0.3%, -0.1%) |
| Asthma                        | 277/36,784<br>(0.8%)                         | 8902/624,466<br>(1.4%)   | -0.7%<br>(-0.8%, -0.6%) | 353/36,784<br>(1.0%)                         | 10,683/624,466<br>(1.7%) | -0.8%<br>(-0.9%, -0.6%) |
| ICU/surgery/death             | 20/36,784<br>(0.1%)                          | 702/624,466<br>(0.1%)    | -0.1%<br>(-0.1%, 0.0%)  | 34/36,784<br>(0.1%)                          | 886/624,466<br>(0.1%)    | 0.0%<br>(-0.1%, 0.0%)   |
| <b>Abdominal X Ray</b>        |                                              |                          |                         |                                              |                          |                         |
| Constipation                  | 236/32,094<br>(0.7%)                         | 2509/295,106<br>(0.9%)   | -0.1%<br>(-0.2%, 0.0%)  | 345/32,094<br>(1.1%)                         | 3688/295,106<br>(1.2%)   | -0.2%<br>(-0.3%, -0.1%) |
| ICU/surgery/death             | 60/32,094<br>(0.2%)                          | 528/295,106<br>(0.2%)    | 0.0%<br>(0.0%, 0.1%)    | 75/32,094<br>(0.2%)                          | 690/295,106<br>(0.2%)    | 0.0%<br>(-0.1%, 0.1%)   |
| Abdominal Pain                | 681/49,685<br>(1.4%)                         | 6574/458,400<br>(1.4%)   | -0.1%<br>(-0.2%, 0.0%)  | 918/49,685<br>(1.8%)                         | 8737/458,400<br>(1.9%)   | -0.1%<br>(-0.2%, 0.1%)  |
| ICU/surgery/death             | 237/49,685<br>(0.5%)                         | 1904/458,400<br>(0.4%)   | 0.1%<br>(0.0%, 0.1%)    | 285/49,685<br>(0.6%)                         | 2435/458,400<br>(0.5%)   | 0.0%<br>(0.0%, 0.1%)    |
| <b>Abdominal Ultrasound</b>   |                                              |                          |                         |                                              |                          |                         |
| Constipation                  | 236/32,094<br>(0.7%)                         | 2509/295,106<br>(0.9%)   | -0.1%<br>(-0.2%, 0.0%)  | 345/32,094<br>(1.1%)                         | 3688/295,106<br>(1.2%)   | -0.2%<br>(-0.3%, -0.1%) |
| ICU/surgery/death             | 60/32,094<br>(0.2%)                          | 528/295,106<br>(0.2%)    | 0.0%<br>(0.0%, 0.1%)    | 75/32,094<br>(0.2%)                          | 690/295,106<br>(0.2%)    | 0.0%<br>(-0.1%, 0.1%)   |
| Abdominal Pain                | 681/49,685<br>(1.4%)                         | 6574/458,400<br>(1.4%)   | -0.1%<br>(-0.2%, 0.0%)  | 918/49,685<br>(1.8%)                         | 8737/458,400<br>(1.9%)   | -0.1%<br>(-0.2%, 0.1%)  |
| ICU/surgery/death             | 237/49,685<br>(0.5%)                         | 1904/458,400<br>(0.4%)   | 0.1%<br>(0.0%, 0.1%)    | 285/49,685<br>(0.6%)                         | 2435/458,400<br>(0.5%)   | 0.0%<br>(0.0%, 0.1%)    |

eTable 7. (continued)

| Imaging modality by Condition | Hospital Admission within 3 days of ED visit |                        |                         | Hospital Admission within 7 days of ED visit |                        |                         |
|-------------------------------|----------------------------------------------|------------------------|-------------------------|----------------------------------------------|------------------------|-------------------------|
|                               | Ontario n (%)                                | US n (%)               | Difference (95%CI)      | Ontario n (%)                                | US n (%)               | Difference (95%CI)      |
| <b>Abdominal CT</b>           |                                              |                        |                         |                                              |                        |                         |
| Constipation                  | 236/32,094<br>(0.7%)                         | 2509/295,106<br>(0.9%) | -0.1%<br>(-0.2%, 0.0%)  | 345/32,094<br>(1.1%)                         | 3688/295,106<br>(1.2%) | -0.2%<br>(-0.3%, -0.1%) |
| ICU/surgery/death             | 60/32,094<br>(0.2%)                          | 528/295,106<br>(0.2%)  | 0.0%<br>(0.0%, 0.1%)    | 75/32,094<br>(0.2%)                          | 690/295,106<br>(0.2%)  | 0.0%<br>(-0.1%, 0.1%)   |
| Abdominal Pain                | 681/49,685<br>(1.4%)                         | 6574/458,400<br>(1.4%) | -0.1%<br>(-0.2%, 0.0%)  | 918/49,685<br>(1.8%)                         | 8737/458,400<br>(1.9%) | -0.1%<br>(-0.2%, 0.1%)  |
| ICU/surgery/death             | 237/49,685<br>(0.5%)                         | 1904/458,400<br>(0.4%) | 0.1%<br>(0.0%, 0.1%)    | 285/49,685<br>(0.6%)                         | 2435/458,400<br>(0.5%) | 0.0%<br>(0.0%, 0.1%)    |
| <b>Head CT</b>                |                                              |                        |                         |                                              |                        |                         |
| Concussion                    | 31/17,261<br>(0.2%)                          | 177/69,838<br>(0.3%)   | -0.1%<br>(-0.1%, 0.0%)  | 40/17,261<br>(0.2%)                          | 253/69,838<br>(0.4%)   | -0.1%<br>(-0.2%, 0.0%)  |
| ICU/surgery/death             | ≤5/17,261                                    | 18/69,838<br>(0.0%)    | *                       | 7/17,261<br>(0.0%)                           | 35/69,838<br>(0.1%)    | 0.0%<br>(0.0%, 0.0%)    |
| Simplex Febrile Convulsion    | 78/5222<br>(1.5%)                            | 1710/80,708<br>(2.1%)  | -0.6%<br>(-1.0%, -0.3%) | 85/5222<br>(1.6%)                            | 1955/80,708<br>(2.4%)  | -0.8%<br>(-1.2%, -0.4%) |
| ICU/surgery/death             | 6/5222<br>(0.1%)                             | 74/80,708<br>(0.1%)    | 0.0%<br>(-0.1%, 0.1%)   | 7/5222<br>(0.1%)                             | 108/80,708<br>(0.1%)   | 0.0%<br>(-0.1%, y=0.1%) |
| Complex Febrile Convulsion    | 7/171<br>(4.1%)                              | 95/2635<br>(3.6%)      | 0.5%<br>(-2.6%, 3.5%)   | 7/171<br>(4.1%)                              | 98/2635<br>(3.7%)      | 0.4%<br>(-2.7%, 3.4%)   |
| ICU/surgery/death             | ≤5/171                                       | 5/2635<br>(0.2%)       | *                       | ≤5/171                                       | 5/2635<br>(0.2%)       | *                       |
| Seizure                       | 42/2041<br>(2.1%)                            | 2062/64,870<br>(3.2%)  | -1.1%<br>(-1.8%, -0.5%) | 63/2041<br>(3.1%)                            | 2735/64,870<br>(4.2%)  | -1.1%<br>(-1.9%, -0.4%) |
| ICU/surgery/death             | ≤5/2041                                      | 167/64,870<br>(0.3%)   | *                       | ≤5/2041                                      | 217/64,870<br>(0.3%)   | *                       |
| Headache                      | 195/19,478<br>(1.0%)                         | 3733/230,516<br>(1.6%) | -0.6%<br>(-0.8%, -0.5%) | 310/19,478<br>(1.6%)                         | 5450/230,516<br>(2.4%) | -0.1%<br>(-0.3%, 0.1%)  |
| ICU/surgery/death             | 26/19,478<br>(0.1%)                          | 290/230,516<br>(0.1%)  | 0.0%<br>(0.0%, 0.1%)    | 46/19,478<br>(0.2%)                          | 455/230,516<br>(0.2%)  | -1.1%<br>(-1.3%, -0.9%) |

**eTable 7. (continued)**

| Imaging modality by Condition | Hospital Admission within 3 days of ED visit |                        |                         | Hospital Admission within 7 days of ED visit |                        |                         |
|-------------------------------|----------------------------------------------|------------------------|-------------------------|----------------------------------------------|------------------------|-------------------------|
|                               | Ontario n (%)                                | US n (%)               | Difference (95%CI)      | Ontario n (%)                                | US n (%)               | Difference (95%CI)      |
| <b>Head MRI</b>               |                                              |                        |                         |                                              |                        |                         |
| Concussion                    | 31/17,261<br>(0.2%)                          | 177/69,838<br>(0.3%)   | -0.1%<br>(-0.1%, 0.0%)  | 40/17,261<br>(0.2%)                          | 253/69,838<br>(0.4%)   | 0.0%<br>(0.0%, 0.1%)    |
| ICU/surgery/death             | ≤5/17,261                                    | 18/69,838<br>(0.0%)    | *                       | 7 /17,261 (0.0%)                             | 35/69,838<br>(0.1%)    | 0.0%<br>(0.0%, 0.0%)    |
| Seizure                       | 42/2041<br>(2.1%)                            | 2062/64,870<br>(3.2%)  | -1.1%<br>(-1.8%, -0.5%) | 63/2041 (3.1%)                               | 2735/64,870<br>(4.2%)  | -1.1%<br>(-1.9%, -0.4%) |
| ICU/surgery/death             | ≤5/2041                                      | 167/64,870<br>(0.3%)   | *                       | ≤5/2041                                      | 217/64,870<br>(0.3%)   | *                       |
| Headache                      | 195/19,478<br>(1.0%)                         | 3733/230,516<br>(1.6%) | -1.5%<br>(-1.6%, -1.4%) | 310/19,478<br>(1.6%)                         | 5450/230,516<br>(2.4%) | -0.8%<br>(-1.0%, -0.6%) |
| ICU/surgery/death             | 26/19,478<br>(0.1%)                          | 290/230,516<br>(0.1%)  | 0.0%<br>(0.0%, 0.1%)    | 46/19,478<br>(0.2%)                          | 455/230,516<br>(0.2%)  | 0.0%<br>(0.0%, 0.1%)    |

US: United States

CCC: complex chronic condition

CT: computed tomography

MRI: magnetic resonance imaging

ICU: intensive care unit

\* unable to calculate due to suppressed data as a result of small cell size.



**eFigure.** Diagnostic imaging use among quality control conditions from the emergency department in 4 children’s hospitals in Ontario, Canada and 26 children’s hospitals in the United States (US), 2006 to 2016.

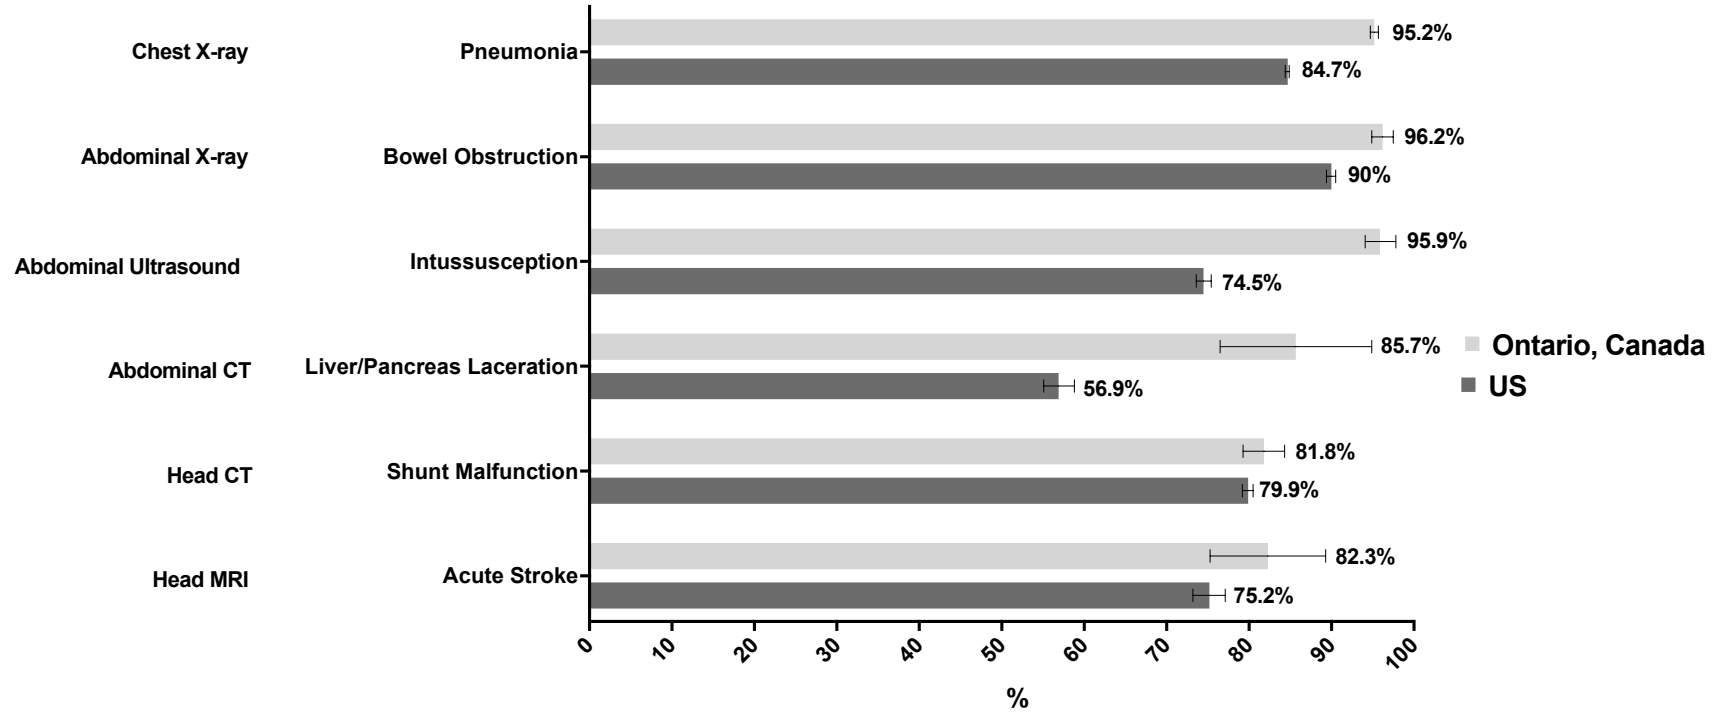

## eReferences.

1. Burstein B, Plint AC, Papenburg J. Use of Radiography in Patients Diagnosed as Having Acute Bronchiolitis in US Emergency Departments, 2007-2015. *JAMA*. 2018;320(15):1598-1600.
2. Johnson LW, Robles J, Hudgins A, Osburn S, Martin D, Thompson A. Management of bronchiolitis in the emergency department: impact of evidence-based guidelines? *Pediatrics*. 2013;131 Suppl 1:S103-109.
3. Knapp JF, Simon SD, Sharma V. Variation and trends in ED use of radiographs for asthma, bronchiolitis, and croup in children. *Pediatrics*. 2013;132(2):245-252.
4. Li J, Monuteaux MC, Bachur RG. Variation in Pediatric Care Between Academic and Nonacademic US Emergency Departments, 1995-2010. *Pediatr Emerg Care*. 2018;34(12):866-871.
5. Parikh K, Hall M, Mittal V, et al. Establishing benchmarks for the hospitalized care of children with asthma, bronchiolitis, and pneumonia. *Pediatrics*. 2014;134(3):555-562.
6. Bourgeois FT, Monuteaux MC, Stack AM, Neuman MI. Variation in emergency department admission rates in US children's hospitals. *Pediatrics*. 2014;134(3):539-545.
7. Freedman SB, Rodean J, Hall M, et al. Delayed Diagnoses in Children with Constipation: Multicenter Retrospective Cohort Study. *J Pediatr*. 2017;186:87-94 e16.
8. Marin JR, Wang L, Winger DG, Mannix RC. Variation in Computed Tomography Imaging for Pediatric Injury-Related Emergency Visits. *J Pediatr*. 2015;167(4):897-904 e893.
9. Kharbanda AB, Hall M, Shah SS, et al. Variation in resource utilization across a national sample of pediatric emergency departments. *J Pediatr*. 2013;163(1):230-236.
